# Supplementary material for: Prognostic value of CXCL17 and CXCR8 expression in patients with colon cancer
Source: PubMed Central journal article supplement — Oncol Lett. 2020 Jul 7;20(3):2711–20. doi: 10.3892/ol.2020.11819 (PMC7400977; doi:10.3892/ol.2020.11819), 2020-07-07

Figure S1. Kaplan-Meier survival curves of CXCL17 and GPR35 mRNA expression levels in colon cancer. P-values were obtained using the log rank test. Expression level cut-offs were determined based on (A and B) median mRNA expression levels or (C and D) mean mRNA levels. N=432. CXCL17, C-X-C motif chemokine ligand 17; GPR35, G protein-coupled receptor 35.

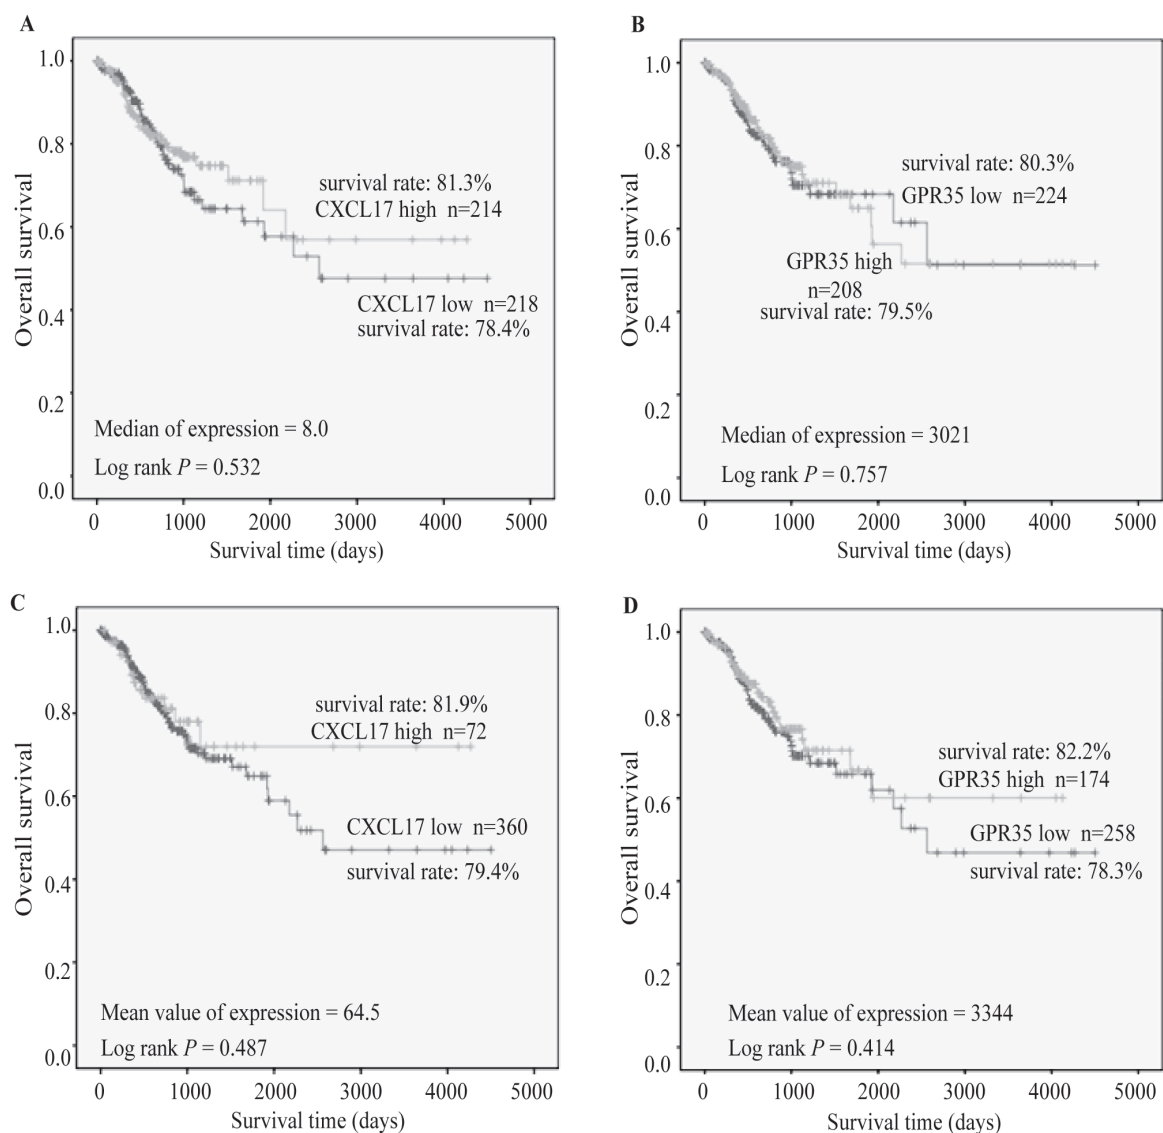

Supplement: Supplementary_Data.pdf [file Supplementary_Data.pdf]
